# Supplementary material for: Thymoquinone Loaded Topical Nanoemulgel for Wound Healing: Formulation Design and In-Vivo Evaluation
Source: MDPI journal article supplement (doi:10.3390/molecules26133863), 2021-06-24
Supplement: s1 [file s1]

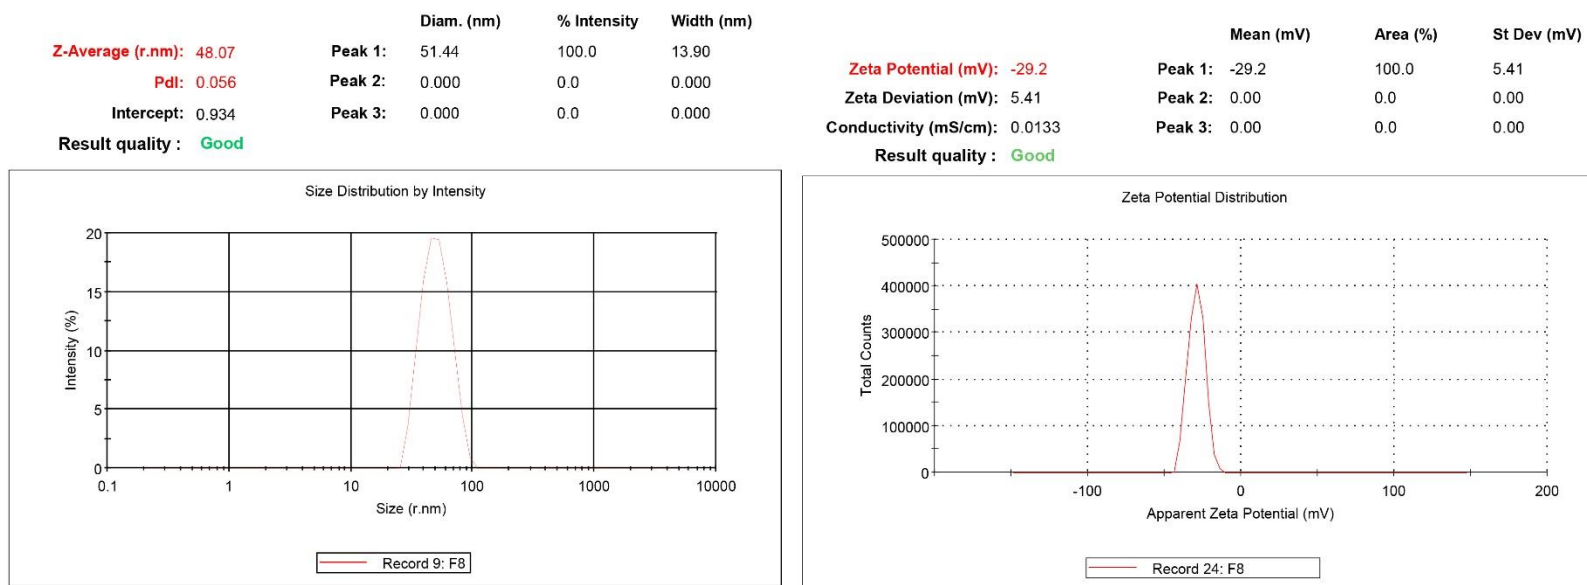

**Figure S1:** Droplet size (14.07 nm with Pdl 0.056) and zeta potential (-29.2 mV) of TMQ-NE [F8]

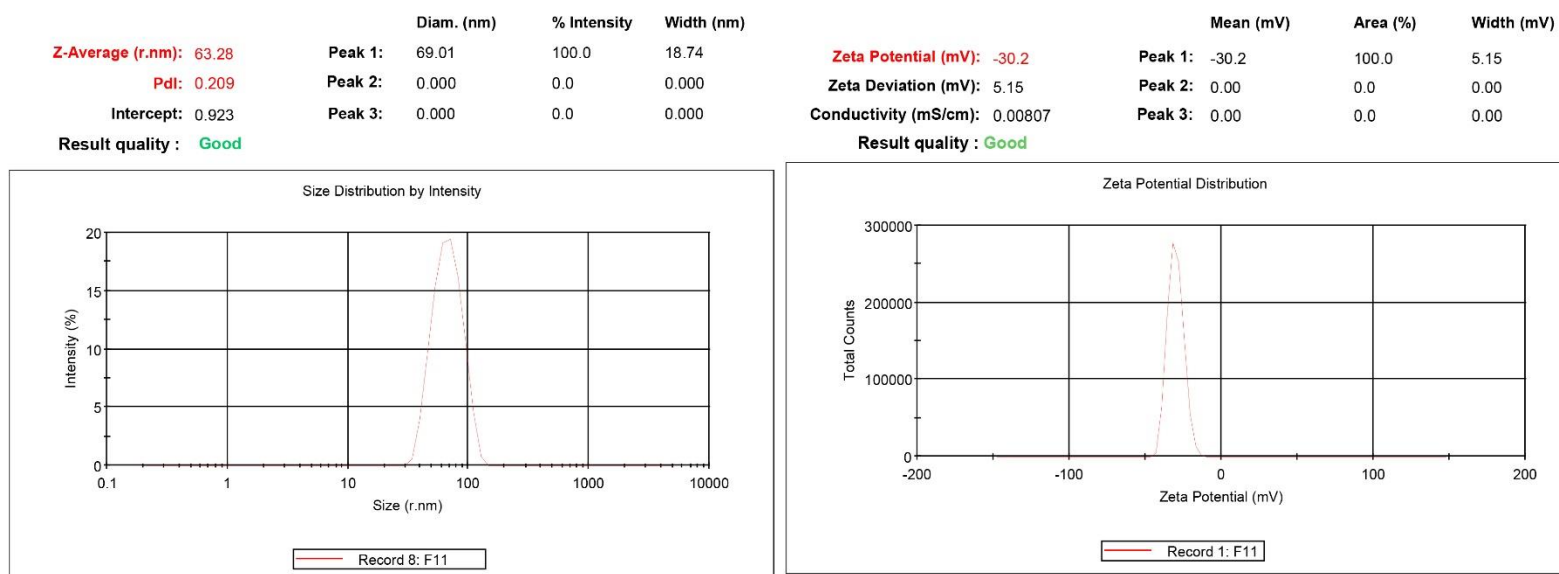

**Figure S2:** Droplet size (63.28 nm with Pdl 0.209) and zeta potential (-30.2 mV) of TMQ-NE [F11]

|                                | Diam. (nm)    | % Intensity | Width (nm) |
|--------------------------------|---------------|-------------|------------|
| <b>Z-Average (r.nm):</b> 39.12 | Peak 1: 56.91 | 100.0       | 37.23      |
| <b>Pdl:</b> 0.562              | Peak 2: 0.000 | 0.0         | 0.000      |
| <b>Intercept:</b> 0.908        | Peak 3: 0.000 | 0.0         | 0.000      |

Result quality : **Good**

|                                     | Mean (mV)     | Area (%) | St Dev (mV) |
|-------------------------------------|---------------|----------|-------------|
| <b>Zeta Potential (mV):</b> -26.8   | Peak 1: -26.8 | 100.0    | 5.05        |
| <b>Zeta Deviation (mV):</b> 5.05    | Peak 2: 0.00  | 0.0      | 0.00        |
| <b>Conductivity (mS/cm):</b> 0.0242 | Peak 3: 0.00  | 0.0      | 0.00        |

Result quality : **Good**

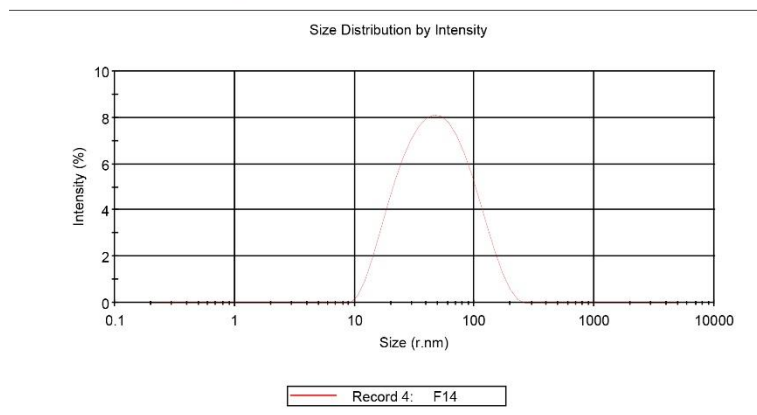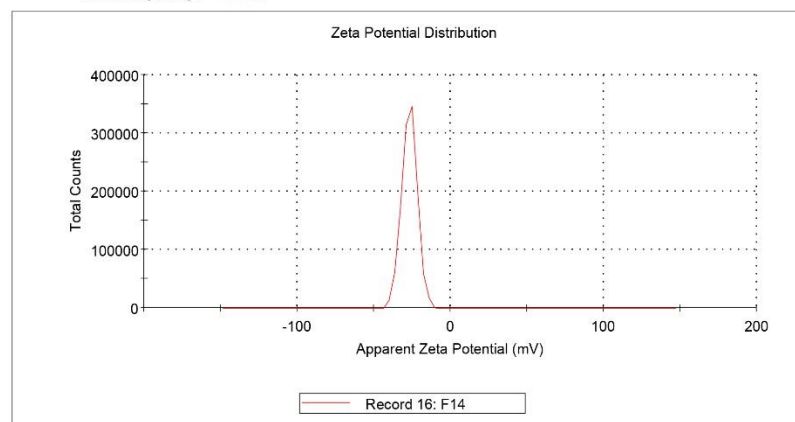

**Figure S3:** Droplet size (39.12 nm with *Pdl* 0.562) and zeta potential (-26.8 mV) of TMQ-NE [F14]
